# Supplementary material for: Treatment-related changes in neuroendocrine tumors as assessed by textural features derived from 68Ga-DOTATOC PET/MRI with simultaneous acquisition of apparent diffusion coefficient
Source: PubMed Central journal article supplement (PMC7161278; doi:10.1186/s12885-020-06836-y), 2020-04-16

**Supplemental Figure 1:**

Axial ADC maps (a+c) and PET (b+d) of 21 years-old patient with G3 NET of the pancreas and disease progression under chemotherapy. Interval between baseline (a+b) and follow-up (c+d) is 5 months.

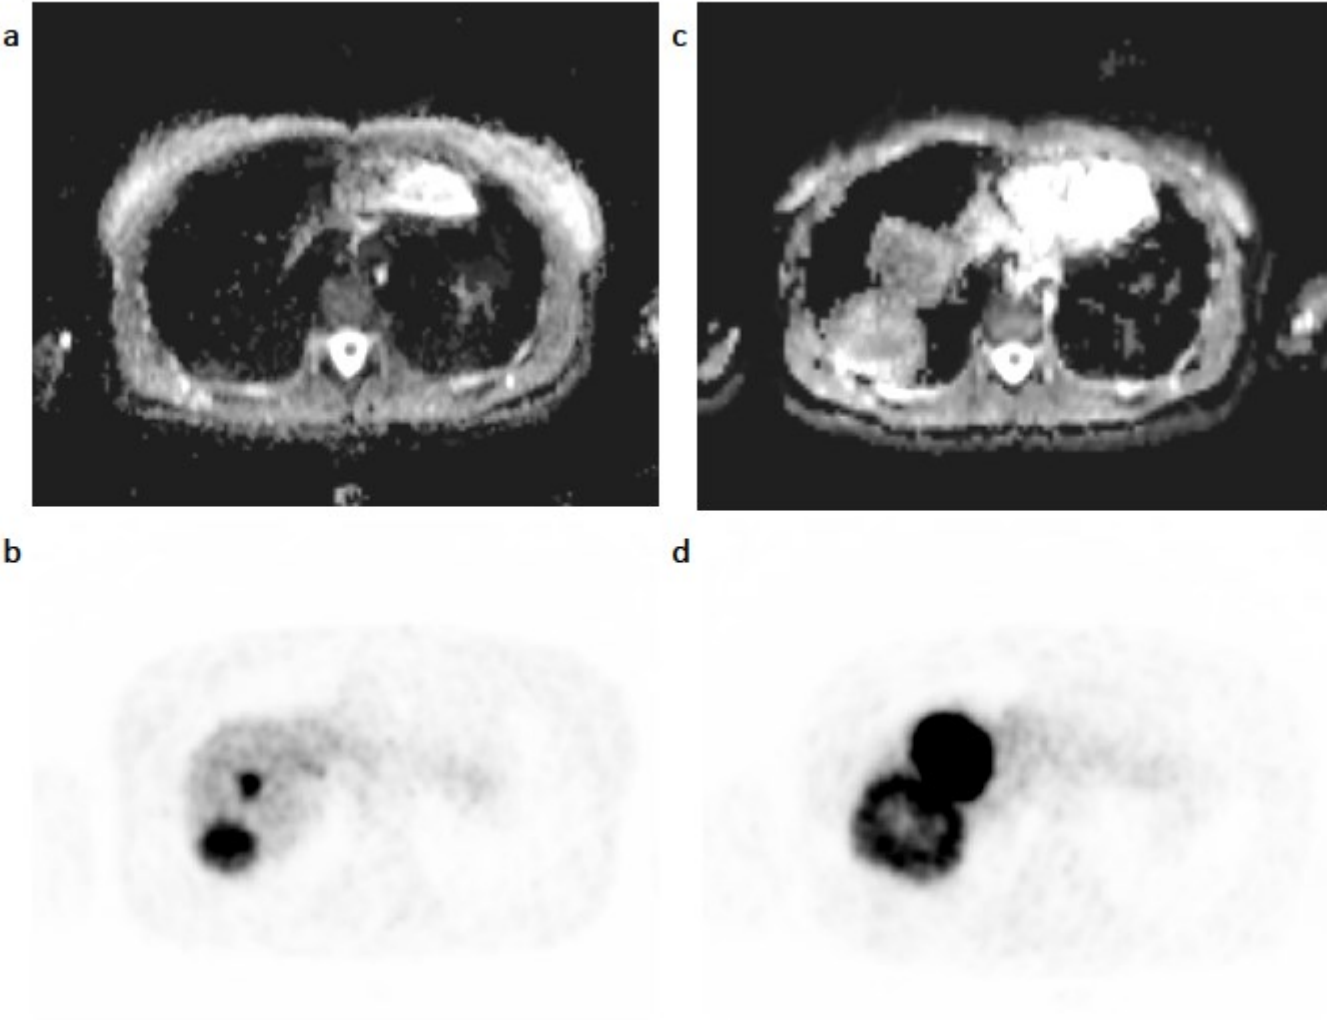

Supplement: 12885_2020_6836_MOESM1_ESM.pdf [file 12885_2020_6836_MOESM1_ESM.pdf]
