# Supplementary material for: Treatment-related changes in neuroendocrine tumors as assessed by textural features derived from 68Ga-DOTATOC PET/MRI with simultaneous acquisition of apparent diffusion coefficient
Source: PubMed Central journal article supplement (PMC7161278; doi:10.1186/s12885-020-06836-y), 2020-04-16

**Supplemental Figure 2:**

Axial ADC maps (a+c) and PET (b+d) of 64 years-old patient with G2 NET of the pancreas showing response to treatment with long-acting somatostatin analogues. Interval between baseline (a+b) and follow-up (c+d) is 12 months.

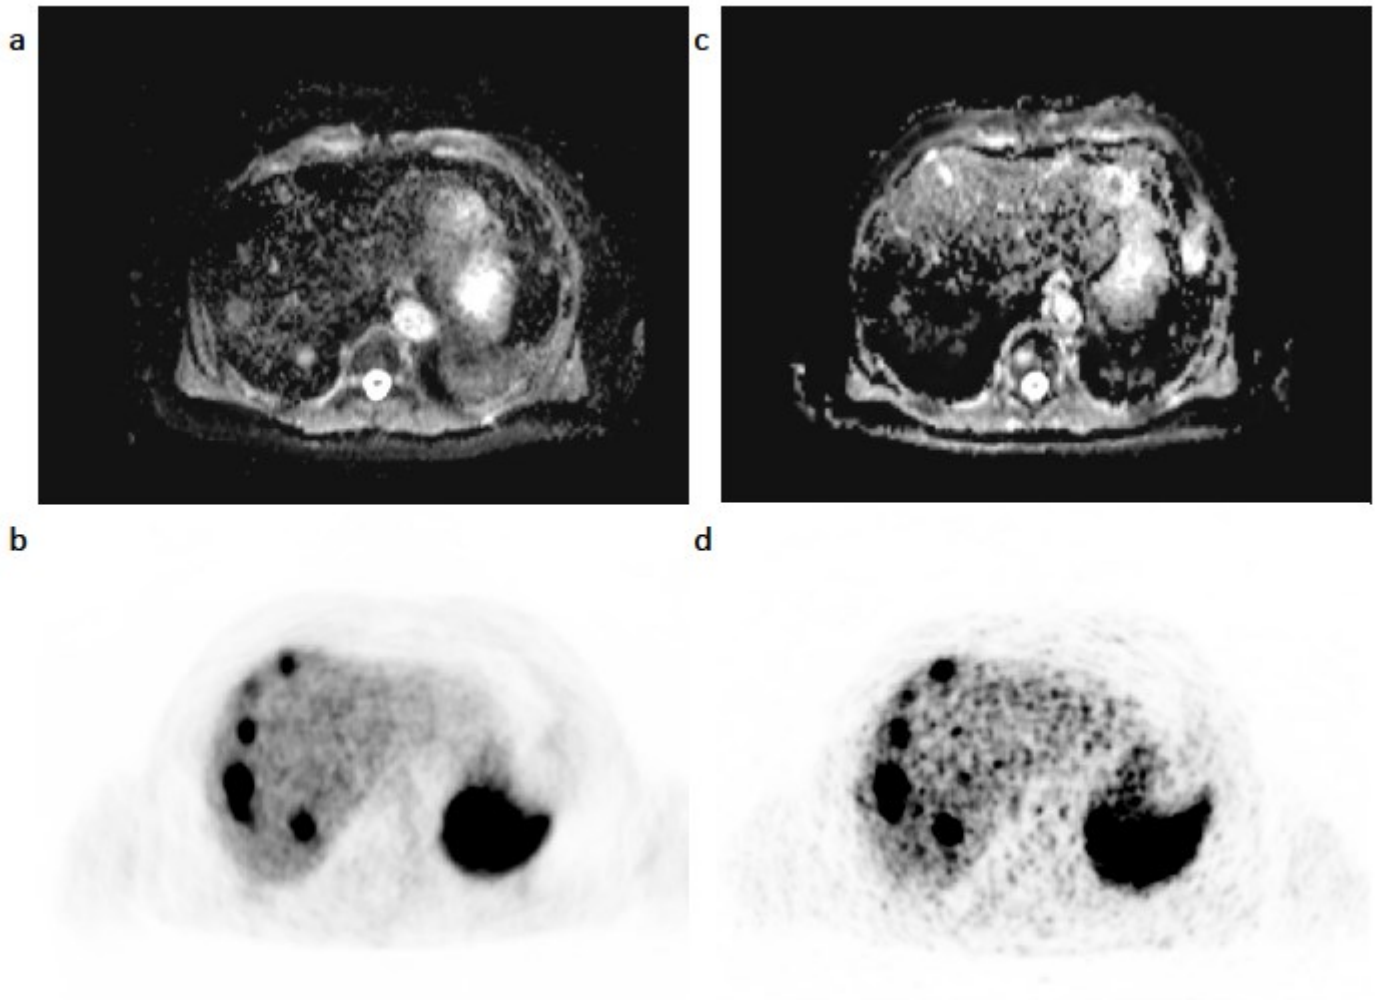

Supplement: 12885_2020_6836_MOESM2_ESM.pdf [file 12885_2020_6836_MOESM2_ESM.pdf]
